# Supplementary material
Source: PubMed Central journal article supplement (PMC6953905)
Supplement: NIHMS1066593-supplement-Supplemental.pdf [file NIHMS1066593-supplement-Supplemental.pdf]

**Supplementary Table 1.** Spearman correlation coefficients between TCE air levels from personal monitoring and urinary levels of TCE and its metabolites among exposed workers

|                              | <i>Trichloroacetic acid (TCA)</i> | <i>Total trichloroethanol (TCEOH)</i> |
|------------------------------|-----------------------------------|---------------------------------------|
| <i>TCE air level</i>         | 0.4448 <sup>a</sup>               | 0.6566                                |
| <i>(continuous variable)</i> | 0.0001 <sup>b</sup>               | 0.0001                                |
|                              | 69 <sup>c</sup>                   | 69                                    |

<sup>a</sup>Spearman correlation coefficient; <sup>b</sup>p-value; <sup>c</sup>number of subjects

**Supplementary Table 2.** Serum microRNAs evaluated in a cross-sectional molecular epidemiology study of occupational TCE exposure in China

| No. | miRNA <sup>a</sup> | Controls (n=90)   |                 | TCE-exposed (n=74) |                 | % difference | P <sup>c</sup> | FDR <sup>d</sup> |
|-----|--------------------|-------------------|-----------------|--------------------|-----------------|--------------|----------------|------------------|
|     |                    | Mean <sup>b</sup> | SD <sup>b</sup> | Mean <sup>b</sup>  | SD <sup>b</sup> |              |                |                  |
| 1   | miR-150-5p         | 176.0             | 75.9            | 147.3              | 63.1            | -16%         | 0.006          | 0.13             |
| 2   | let-7b-5p          | 705.0             | 325.2           | 586.6              | 239.3           | -17%         | 0.008          | 0.13             |
| 3   | miR-92a-3p         | 2478.1            | 798.7           | 2166.8             | 792.2           | -13%         | 0.02           | 0.17             |
| 4   | miR-122-5p         | 1037.7            | 1177.2          | 576.5              | 610.3           | -44%         | 0.03           | 0.17             |
| 5   | let-7g-5p          | 67.5              | 36.1            | 59.2               | 26.8            | -12%         | 0.03           | 0.17             |
| 6   | miR-20a-5p         | 649.8             | 249.9           | 573.4              | 222.1           | -12%         | 0.03           | 0.17             |
| 7   | miR-140-5p         | 8.7               | 4.5             | 7.6                | 4.7             | -13%         | 0.04           | 0.19             |
| 8   | miR-29b-3p         | 22.6              | 14.0            | 19.8               | 11.5            | -12%         | 0.06           | 0.22             |
| 9   | miR-25-3p          | 979.0             | 413.0           | 852.2              | 384.3           | -13%         | 0.06           | 0.22             |
| 10  | miR-22-5p          | 25.0              | 10.1            | 22.7               | 8.8             | -9%          | 0.08           | 0.26             |
| 11  | miR-27b-3p         | 281.2             | 81.1            | 263.3              | 63.6            | -6%          | 0.09           | 0.27             |
| 12  | miR-128-3p         | 66.6              | 17.6            | 62.3               | 15.6            | -7%          | 0.11           | 0.30             |
| 13  | mir-15a-5p         | 368.6             | 157.4           | 333.8              | 132.7           | -9%          | 0.14           | 0.35             |
| 14  | mir-93-5p          | 713.2             | 391.3           | 633.8              | 260.7           | -11%         | 0.15           | 0.35             |
| 15  | miR-30c-5p         | 202.5             | 198.7           | 168.8              | 37.7            | -17%         | 0.18           | 0.40             |
| 16  | miR-151a-3p        | 55.4              | 15.2            | 52.4               | 15.3            | -5%          | 0.22           | 0.42             |
| 17  | miR-24-3p          | 759.4             | 88.3            | 773.3              | 74.7            | 2%           | 0.23           | 0.42             |
| 18  | miR-126-3p         | 273.2             | 66.6            | 283.0              | 63.8            | 4%           | 0.23           | 0.42             |
| 19  | miR-181a-5p        | 115.7             | 31.3            | 112.7              | 36.8            | -3%          | 0.27           | 0.47             |
| 20  | miR-1260b          | 108.2             | 43.3            | 105.9              | 40.8            | -2%          | 0.31           | 0.51             |
| 21  | miR-16-5p          | 5680.5            | 2626.5          | 5276.6             | 2804.4          | -7%          | 0.40           | 0.63             |
| 22  | miR-532-5p         | 51.8              | 32.3            | 45.8               | 22.4            | -12%         | 0.42           | 0.63             |
| 23  | miR-221-3p         | 503.3             | 123.1           | 487.7              | 97.4            | -3%          | 0.45           | 0.65             |
| 24  | miR-199a-3p        | 142.7             | 58.0            | 137.5              | 49.6            | -4%          | 0.53           | 0.70             |
| 25  | miR-27a-3p         | 489.8             | 59.6            | 486.2              | 64.2            | -1%          | 0.55           | 0.70             |
| 26  | miR-361-5p         | 25.5              | 11.2            | 25.3               | 7.8             | -1%          | 0.55           | 0.70             |
| 27  | miR-199a-5p        | 114.8             | 34.5            | 122.0              | 38.9            | 6%           | 0.57           | 0.70             |
| 28  | let-7d-5p          | 132.6             | 41.8            | 134.3              | 42.0            | 1%           | 0.66           | 0.78             |
| 29  | let-7d-3p          | 120.3             | 17.5            | 118.7              | 16.8            | -1%          | 0.71           | 0.78             |
| 30  | miR-744-5p         | 62.0              | 19.5            | 63.7               | 18.7            | 3%           | 0.71           | 0.78             |
| 31  | miR-423-3p         | 43.8              | 16.9            | 44.2               | 13.6            | 1%           | 0.85           | 0.90             |
| 32  | miR-191-5p         | 775.3             | 164.9           | 797.3              | 175.8           | 3%           | 0.96           | 0.99             |
| 33  | miR-26a-5p         | 529.1             | 220.7           | 523.8              | 105.8           | -1%          | 0.99           | 0.99             |

<sup>a</sup>Of the 40 evaluated miRNAs, 7 miRNAs (i.e., miR-28-3p, miR-363-3p, miR-181c-5p, miR-181b-5p, miR-195-5p, miR-32-5p, and miR-183-5p) with a CV  $\geq$ 40% were excluded from statistical analyses; <sup>b</sup>Signals in arbitrary units (A.U.); <sup>c</sup>Estimated by multiple linear regression models adjusted for age, sex, smoking, alcohol use, and recent infection with each log-transformed miRNA level as dependent variable.; <sup>d</sup> false discovery rate; values <0.20 were considered noteworthy.

**Supplementary Table 3.** Pairwise Spearman correlation coefficients for the seven miRNAs that showed significant difference between workers exposed to TCE and unexposed controls

|                            | <i>miR-150-5p</i> | <i>let-7b-5p</i> | <i>miR-92a-3p</i> | <i>miR-122-5p</i> | <i>let-7g-5p</i> | <i>miR-20a-5p</i> | <i>miR-140-5p</i> |                   |
|----------------------------|-------------------|------------------|-------------------|-------------------|------------------|-------------------|-------------------|-------------------|
| <i>Exposed<br/>(n=74)</i>  | <i>miR-150-5p</i> | 0.2369<br>0.04   | 0.2576<br>0.03    | 0.1209<br>0.30    | 0.0888<br>0.45   | 0.2062<br>0.08    | 0.0885<br>0.45    |                   |
|                            | <i>let-7b-5p</i>  |                  | 0.8469<br><0.0001 | 0.0778<br>0.51    | 0.3498<br>0.0002 | 0.8389<br><0.0001 | 0.2624<br>0.02    |                   |
|                            | <i>miR-92a-3p</i> |                  |                   | 0.1549<br>0.19    | 0.1152<br>0.33   | 0.7274<br><0.0001 | 0.1575<br>0.18    |                   |
|                            | <i>miR-122-5p</i> |                  |                   |                   | 0.0170<br>0.89   | 0.0270<br>0.82    | -0.0575<br>0.63   |                   |
|                            | <i>let-7g-5p</i>  |                  |                   |                   |                  | 0.5196<br><0.001  | 0.5613<br><0.0001 |                   |
|                            | <i>miR-20a-5p</i> |                  |                   |                   |                  |                   | 0.3468<br>0.003   |                   |
|                            | <i>miR-140-5p</i> |                  |                   |                   |                  |                   |                   |                   |
|                            | <i>miR-150-5p</i> | <i>let-7b-5p</i> | <i>miR-92a-3p</i> | <i>miR-122-5p</i> | <i>let-7g-5p</i> | <i>miR-20a-5p</i> | <i>miR-140-5p</i> |                   |
| <i>Controls<br/>(n=90)</i> | <i>miR-150-5p</i> |                  | 0.3827<br>0.0002  | 0.3568<br>0.0006  | 0.770<br>0.47    | 0.0996<br>0.35    | 0.2618<br>0.01    | 0.0759<br>0.48    |
|                            | <i>let-7b-5p</i>  |                  |                   | 0.6240<br><0.0001 | 0.2834<br>0.0007 | 0.3554<br>0.0006  | 0.6690<br><0.0001 | 0.2644<br>0.01    |
|                            | <i>miR-92a-3p</i> |                  |                   |                   | 0.2299<br>0.03   | -0.0599<br>0.60   | 0.5086<br><0.0001 | -0.0043<br>0.97   |
|                            | <i>miR-122-5p</i> |                  |                   |                   |                  | 0.1802<br>0.09    | 0.3218<br>0.002   | -0.0095<br>0.93   |
|                            | <i>let-7g-5p</i>  |                  |                   |                   |                  |                   | 0.4243<br><0.0001 | 0.4361<br><0.0001 |
|                            | <i>miR-20a-5p</i> |                  |                   |                   |                  |                   |                   | 0.3837<br>0.0002  |
|                            | <i>miR-140-5p</i> |                  |                   |                   |                  |                   |                   |                   |

Note: Colors represent range of correlation coefficients: No color ( $|r| < 0.15$ ), Blue ( $0.15 \leq |r| < 0.3$ ), Yellow ( $0.3 \leq |r| < 0.5$ ), and Red ( $0.5 \leq |r|$ ).

**Supplementary Table 4.** Correlations between selected miRNAs (mir-150-5p, let-7b-5p and let-7g-5p) and immune markers previously reported in the cross-sectional molecular epidemiology study of occupational TCE exposure in China

|                     | <i>Exposed</i>      |                  |                  | <i>Controls</i>   |                  |                  | <i>Total</i>      |                  |                  |
|---------------------|---------------------|------------------|------------------|-------------------|------------------|------------------|-------------------|------------------|------------------|
|                     | <i>miR-150-5p</i>   | <i>let-7b-5p</i> | <i>let-7g-5p</i> | <i>miR-150-5p</i> | <i>let-7b-5p</i> | <i>let-7g-5p</i> | <i>miR-150-5p</i> | <i>let-7b-5p</i> | <i>let-7g-5p</i> |
| <i>WBC</i>          | 0.1703 <sup>a</sup> | 0.0249           | 0.0216           | 0.0406            | -0.0715          | -0.1361          | 0.1009            | -0.0183          | -0.0500          |
|                     | 0.15 <sup>b</sup>   | 0.83             | 0.86             | 0.70              | 0.50             | 0.20             | 0.20              | 0.82             | 0.53             |
|                     | 74 <sup>c</sup>     | 74               | 74               | 90                | 90               | 90               | 164               | 164              | 164              |
| <i>Granulocytes</i> | 0.0772              | 0.0657           | -0.0003          | -0.0637           | -0.0687          | -0.1392          | -0.0274           | -0.0351          | -0.0750          |
|                     | 0.51                | 0.58             | 0.99             | 0.55              | 0.52             | 0.19             | 0.73              | 0.66             | 0.34             |
|                     | 74                  | 74               | 74               | 90                | 90               | 90               | 164               | 164              | 164              |
| <i>Monocytes</i>    | 0.1668              | 0.0708           | 0.1167           | 0.0323            | 0.0249           | -0.0182          | 0.0813            | 0.0457           | 0.0355           |
|                     | 0.16                | 0.55             | 0.32             | 0.76              | 0.82             | 0.86             | 0.30              | 0.56             | 0.65             |
|                     | 74                  | 74               | 74               | 90                | 90               | 90               | 164               | 164              | 164              |
| <i>Lymphocytes</i>  | 0.1970              | -0.1229          | 0.0191           | 0.2275            | -0.0665          | -0.0694          | 0.2480            | -0.0377          | -0.0043          |
|                     | 0.09                | 0.30             | 0.87             | 0.03              | 0.53             | 0.52             | 0.001             | 0.63             | 0.96             |
|                     | 74                  | 74               | 74               | 90                | 90               | 90               | 164               | 164              | 164              |
| <i>T-cells</i>      | 0.1115              | -0.1530          | 0.1029           | 0.2485            | -0.0766          | -0.0344          | 0.2139            | -0.0702          | 0.0207           |
|                     | 0.34                | 0.19             | 0.38             | 0.02              | 0.47             | 0.75             | 0.006             | 0.37             | 0.79             |
|                     | 74                  | 74               | 74               | 90                | 90               | 90               | 164               | 164              | 164              |
| <i>CD4 T-cells</i>  | 0.1654              | -0.2145          | 0.1311           | 0.2913            | -0.0378          | -0.0260          | 0.2584            | -0.0868          | 0.0406           |
|                     | 0.16                | 0.07             | 0.27             | 0.01              | 0.73             | 0.80             | 0.001             | 0.27             | 0.61             |
|                     | 74                  | 74               | 74               | 90                | 90               | 90               | 164               | 164              | 164              |
| <i>CD8 T-cells</i>  | 0.1291              | -0.0303          | 0.1347           | 0.1672            | -0.0350          | -0.0260          | 0.1791            | -0.0038          | 0.0619           |
|                     | 0.27                | 0.80             | 0.25             | 0.12              | 0.77             | 0.81             | 0.02              | 0.96             | 0.43             |
|                     | 74                  | 74               | 74               | 90                | 90               | 90               | 164               | 164              | 164              |
| <i>B-cells</i>      | 0.1834              | -0.1739          | -0.2107          | 0.2234            | 0.0369           | 0.0107           | 0.2281            | -0.0069          | -0.0696          |
|                     | 0.12                | 0.14             | 0.07             | 0.03              | 0.73             | 0.92             | 0.003             | 0.93             | 0.38             |
|                     | 74                  | 74               | 74               | 90                | 90               | 90               | 164               | 164              | 164              |
| <i>NK cells</i>     | 0.1949              | 0.1148           | -0.0188          | 0.0705            | -0.0357          | -0.0769          | 0.1622            | 0.0712           | -0.0260          |
|                     | 0.10                | 0.33             | 0.87             | 0.51              | 0.74             | 0.47             | 0.04              | 0.37             | 0.74             |
|                     | 74                  | 74               | 74               | 90                | 90               | 90               | 164               | 164              | 164              |
| <i>CD27</i>         | 0.2481              | -0.0845          | 0.0060           | 0.0716            | 0.1521           | -0.0005          | 0.2156            | 0.1608           | 0.0341           |
|                     | 0.03                | 0.48             | 0.96             | 0.50              | 0.15             | 0.99             | 0.006             | 0.04             | 0.67             |
|                     | 73                  | 73               | 73               | 90                | 90               | 90               | 163               | 163              | 163              |
| <i>CD30</i>         | -0.0348             | 0.0172           | 0.0524           | 0.0941            | 0.1030           | 0.0653           | 0.1376            | 0.1304           | 0.0698           |
|                     | 0.77                | 0.88             | 0.66             | 0.38              | 0.33             | 0.54             | 0.08              | 0.10             | 0.37             |
|                     | 74                  | 74               | 74               | 90                | 90               | 90               | 164               | 164              | 164              |
| <i>IgG</i>          | 0.1447              | 0.0990           | -0.0152          | -0.0592           | 0.0292           | -0.1520          | 0.1257            | 0.1282           | -0.0642          |
|                     | 0.22                | 0.40             | 0.90             | 0.70              | 0.85             | 0.32             | 0.17              | 0.16             | 0.49             |
|                     | 74                  | 74               | 74               | 45                | 45               | 45               | 119               | 119              | 119              |
| <i>IgM</i>          | 0.0413              | 0.0043           | -0.1091          | -0.3185           | -0.2432          | -0.2698          | -0.0304           | -0.0252          | -0.1042          |
|                     | 0.73                | 0.97             | 0.35             | 0.03              | 0.11             | 0.07             | 0.74              | 0.79             | 0.26             |
|                     | 74                  | 74               | 74               | 45                | 45               | 45               | 119               | 119              | 119              |

<sup>a</sup>Spearman correlation coefficient; <sup>b</sup>p-value; <sup>c</sup>number of subjects

**Note:** Colors represent range of correlation coefficients: No color ( $|r| < 0.15$ ), Blue ( $0.15 \leq |r| < 0.3$ ), Yellow ( $0.3 \leq |r| < 0.5$ ), and Red ( $0.5 \leq |r|$ ).

**Supplementary Table 5.** Associations between demographic characteristics and the seven miRNAs that showed significant differences between workers exposed to TCE and unexposed controls

|                            |                            | <i>miR-150-5p</i>    | <i>let-7b-5p</i>          | <i>miR-92a-3p</i> | <i>miR-122-5p</i> | <i>let-7g-5p</i> | <i>miR-20a-5p</i> | <i>miR-140-5p</i> |             |
|----------------------------|----------------------------|----------------------|---------------------------|-------------------|-------------------|------------------|-------------------|-------------------|-------------|
| <i>Exposed<br/>(n=74)</i>  | <b>Age</b>                 | -0.0009 <sup>a</sup> | -0.0247                   | 0.1684            | 0.3480            | -0.1705          | -0.0509           | -0.1003           |             |
|                            |                            | 0.99 <sup>b</sup>    | 0.83                      | 0.15              | 0.002             | 0.15             | 0.67              | 0.40              |             |
|                            | <b>BMI</b>                 | -0.0073              | -0.0914                   | -0.0069           | 0.2323            | -0.0333          | -0.0740           | 0.1367            |             |
|                            |                            | 0.95                 | 0.44                      | 0.95              | 0.05              | 0.78             | 0.53              | 0.25              |             |
|                            | <b>Sex</b>                 | Female               | 151.9 (55.1) <sup>c</sup> | 491.8 (246.8)     | 1786.6 (819.3)    | 385.5 (322.5)    | 54.5 (27.5)       | 531.7 (298.5)     | 7.4 (4.0)   |
|                            |                            | Male                 | 145.5 (66.4) <sup>c</sup> | 624.2 (227.7)     | 2317.4 (735.7)    | 652.1 (679.9)    | 61.1 (26.6)       | 589.9 (184.4)     | 7.7 (5.0)   |
|                            | <b>Current smoking</b>     | No                   | 148.1 (48.0)              | 531.6 (206.9)     | 1998.2 (721.9)    | 511.8 (44.6)     | 55.8 (27.3)       | 546.3 (232.5)     | 7.7 (4.4)   |
|                            |                            | Yes                  | 146.1 (79.5)              | 658.9 (262.0)     | 2387.9 (836.4)    | 661.4 (779.2)    | 63.7 (25.9)       | 608.9 (205.8)     | 7.6 (5.2)   |
|                            | <b>Current alcohol use</b> | No                   | 147.4 (58.0)              | 539.8 (235.0)     | 2006.8 (748.3)    | 559.6 (624.1)    | 58.4 (27.0)       | 547.4 (230.1)     | 7.66 (5.17) |
|                            |                            | Yes                  | 147.1 (73.9)              | 684.2 (222.2)     | 2500.0 (792.0)    | 611.6 (592.1)    | 60.9 (26.9)       | 627.3 (198.1)     | 7.55 (3.70) |
| <b>Recent infection</b>    | No                         | 133.2 (50.1)         | 554.7 (226.5)             | 2091.6 (779.4)    | 606.5 (647.8)     | 58.6 (25.2)      | 542.8 (191.7)     | 7.8 (4.8)         |             |
|                            | Yes                        | 202.5 (79.1)         | 712.5 (254.3)             | 2462.2 (798.9)    | 458.3 (430.0)     | 61.9 (33.1)      | 693.5 (292.5)     | 7.0 (4.6)         |             |
|                            |                            | 0.0002               | 0.01                      | 0.07              | 0.33              | 0.83             | 0.05              | 0.49              |             |
|                            |                            | <i>mR-150-5p</i>     | <i>let-7b-5p</i>          | <i>miR-92a-3p</i> | <i>miR-122-5p</i> | <i>let-7g-5p</i> | <i>miR-20a-5p</i> | <i>miR-140-5p</i> |             |
| <i>Controls<br/>(n=90)</i> | <b>Age</b>                 | 0.0128               | -0.0205                   | 0.2363            | 0.270             | -0.2034          | 0.1194            | -0.1631           |             |
|                            |                            | 0.90                 | 0.85                      | 0.02              | 0.01              | 0.05             | 0.26              | 0.12              |             |
|                            | <b>BMI</b>                 | -0.1083              | 0.0038                    | 0.1838            | 0.2307            | -0.1591          | 0.0841            | -0.1731           |             |
|                            |                            | 0.31                 | 0.97                      | 0.08              | 0.03              | 0.13             | 0.43              | 0.10              |             |
|                            | <b>Sex</b>                 | Female               | 148.7 (54.0)              | 620.1 (228.3)     | 2239.8 (595.6)    | 840.1 (1181.0)   | 58.3 (18.0)       | 607.3 (118.3)     | 8.3 (4.3)   |
|                            |                            | Male                 | 184.3 (80.0)              | 730.9 (346.6)     | 2550.6 (841.3)    | 1097.9 (1178.1)  | 70.3 (39.7)       | 662.7 (277.3)     | 8.9 (4.6)   |
|                            | <b>Current smoking</b>     | No                   | 175.1 (64.9)              | 702.5 (328.7)     | 2440.0 (779.2)    | 1050.5 (1240.9)  | 62.6 (30.2)       | 660.7 (253.2)     | 8.4 (4.4)   |
|                            |                            | Yes                  | 177.2 (91.1)              | 708.8 (324.5)     | 2535.3 (834.9)    | 1018.6 (1091.6)  | 74.7 (43.0)       | 633.4 (247.5)     | 9.2 (4.7)   |
|                            | <b>Current alcohol use</b> | No                   | 180.6 (82.5)              | 708.0 (351.5)     | 2490.0 (811.3)    | 1052.9 (1221.8)  | 66.5 (37.5)       | 658.3 (267.7)     | 9.0 (4.5)   |
|                            |                            | Yes                  | 169.3 (66.0)              | 700.7 (288.0)     | 2461.1 (791.0)    | 1016.1 (1126.5)  | 68.9 (34.6)       | 637.5 (225.0)     | 8.4 (4.6)   |
| <b>Recent infection</b>    | No                         | 175.9 (76.7)         | 713.1 (347.7)             | 2505.3 (842.1)    | 945.1 (1118.5)    | 66.1 (35.7)      | 644.9 (249.9)     | 8.83 (4.35)       |             |
|                            | Yes                        | 176.2 (75.3)         | 678.4 (241.7)             | 2388.9 (645.4)    | 1342.1 (1336.6)   | 72.1 (38.0)      | 665.8 (255.5)     | 8.46 (5.10)       |             |
|                            |                            | 0.99                 | 0.74                      | 0.81              | 0.14              | 0.38             | 0.83              | 0.61              |             |

<sup>a</sup> Spearman correlation coefficients presented for miRNAs and continuous co-variates (age, BMI); <sup>b</sup> p-value for Spearman correlation coefficient; <sup>c</sup> mean (standard deviation); <sup>d</sup> p-value calculated from Wilcoxon Rank Sum Test for categorical co-variates (sex, current smoking, current alcohol use, and recent infection).

**Note:** Colors represent range of correlation coefficients or p-value calculated from Wilcoxon Rank Sum Test: No color ( $|r| < 0.15$  or Wilcoxon p-value  $> 0.05$ ), Blue ( $0.15 \leq |r| < 0.3$ ), Yellow ( $0.3 \leq |r| < 0.5$ ), Red ( $0.5 \leq |r|$ ), and Orange (Wilcoxon p-value  $< 0.05$ ).

**Supplementary Table 6. Comparison of the levels of miR-150-5p and let-7b-5p between controls and low exposure group with different cut-point**

| Variable       | Controls<br>(n=90)               | TCE-exposed group<br>(<5 ppm) (n=23) |                   |                             | (<10 ppm) (n=35)                 |                   |                             | (<20 ppm) (n=53)                 |                   |                             | (<30 ppm) (n=59)                 |                   |                             | (<40 ppm) (n=67)                 |                   |                             |
|----------------|----------------------------------|--------------------------------------|-------------------|-----------------------------|----------------------------------|-------------------|-----------------------------|----------------------------------|-------------------|-----------------------------|----------------------------------|-------------------|-----------------------------|----------------------------------|-------------------|-----------------------------|
|                | <b>Mean<br/>(SD)<sup>a</sup></b> | <b>Mean<br/>(SD)</b>                 | <b>%<br/>diff</b> | <b><i>P</i><sup>b</sup></b> | <b>Mean<br/>(SD)<sup>a</sup></b> | <b>%<br/>diff</b> | <b><i>P</i><sup>b</sup></b> |
| has-miR-150-5p | 176.0<br>(75.9)                  | 156.5<br>(60.5)                      | -11%              | 0.36                        | 154.1<br>(58.5)                  | -12%              | 0.20                        | 149.7<br>(57.9)                  | -15%              | 0.06                        | <b>149.4<br/>(56.3)</b>          | <b>-15%</b>       | <b>0.04</b>                 | <b>145.8<br/>(55.9)</b>          | <b>-17%</b>       | <b>0.008</b>                |
| let-7b-5p      | 705.0<br>(325.2)                 | 619.5<br>(249.8)                     | -12%              | 0.29                        | <b>580.8<br/>(228.2)</b>         | <b>-18%</b>       | <b>0.04</b>                 | <b>589.7<br/>(256.4)</b>         | <b>-16%</b>       | <b>0.04</b>                 | <b>585.0<br/>(247.4)</b>         | <b>-17%</b>       | <b>0.02</b>                 | <b>583.3<br/>(283.3)</b>         | <b>-17%</b>       | <b>0.01</b>                 |

<sup>a</sup>Signals in arbitrary unit (A.U.); <sup>b</sup> Estimated by multiple linear regression models adjusted for age, sex, smoking, alcohol use, and recent infection with each log-transformed miRNA level as dependent variable.
